# Supplementary material for: A highly sensitive fluorescence assay for 2,4,6-trinitrotoluene using amine-capped silicon quantum dots as a probe
Source: Royal Society of Chemistry journal article supplement (doi:10.1039/c4ay02729a), 2015-01-01
Supplement: c4ay02729a1.pdf [file c4ay02729a1.pdf]

## Electronic Supplementary Information

### A highly sensitive fluorescence assay for 2,4,6-trinitrotoluene using amine-capped silicon quantum dots as a probe

Rui Ban <sup>a,c</sup>, Fenfen Zheng <sup>a</sup>, Jianrong Zhang <sup>\*,a,b</sup>

<sup>a</sup>State Key Laboratory of Analytical Chemistry for Life Science, School of Chemistry and Chemical Engineering, Nanjing University, Nanjing 210093, P. R. China. E-mail: jrzhang@nju.edu.cn; Tel: +86 25 83686130. Fax: +86 25 83317761.

<sup>b</sup>School of Chemistry and Life Science, Nanjing University Jinling College, Nanjing 210089, PR China

<sup>c</sup>School of Chemistry and Environmental Science, Guizhou Minzu University, Guiyang, 550025, P. R. China

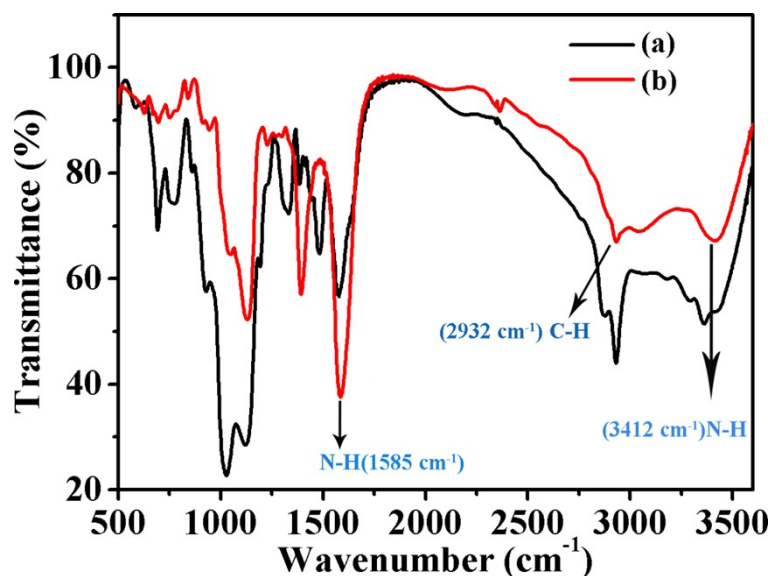

**Fig.S1** The FTIR spectrum of the APTMS (a) and the prepared SiQDs (b).

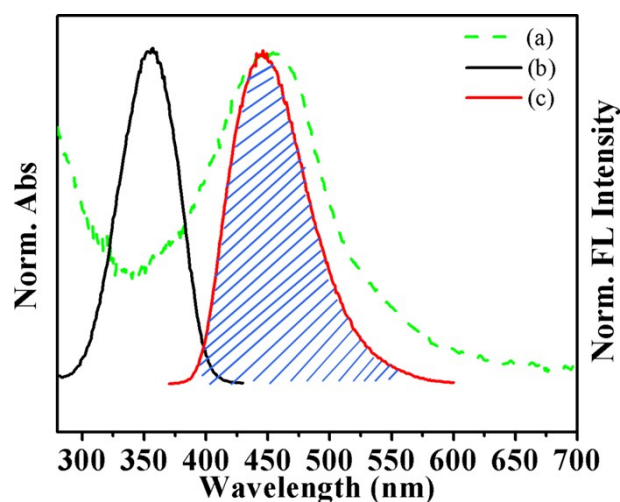

**Fig.S2** Normalized absorption spectrum of TNT-amine-capped SiQDs solution (a), normalized excitation spectra (b) and emission spectra (curve c) of the prepared SiQDs solution.

**Table S1.** Comparison of different methods for TNT detection

| Detection technique      | Probe                                                       | Linear range       | LOD         | Real samples     | Ref.      |
|--------------------------|-------------------------------------------------------------|--------------------|-------------|------------------|-----------|
| ECL                      | APTES-modified RuSiNPs                                      | 1–1000 nM          | 0.3 nM      | N/A <sup>a</sup> | [1]       |
| dynamic light scattering | p-ATP modified gold nanoparticle                            | N/A <sup>a</sup>   | 100 pM      | N/A <sup>a</sup> | [2]       |
| electrochemistry         | graphene nanoribbon-based electrode                         | 4.4–66 $\mu$ M     | 4.4 $\mu$ M | seawater         | [3]       |
| absorbance               | magnetic nanoparticle-QD composite                          | 6.25–600 nM        | 4.6 nM      | N/A <sup>a</sup> | [4]       |
| fluorescence             | amine-capped ZnS-Mn <sup>2+</sup> nanocrystals              | N/A <sup>a</sup>   | 1 nM        | N/A <sup>a</sup> | [5]       |
| fluorescence             | graphene quantum dots                                       | 2.2–8000 $\mu$ M   | 2.2 $\mu$ M | N/A <sup>a</sup> | [6]       |
| fluorescence             | white-UCNPs                                                 | 0.04–19.8 $\mu$ M  | 37 nM       | N/A <sup>a</sup> | [7]       |
| fluorescence             | FITC functionalized NH <sub>2</sub> - $\beta$ -cyclodextrin | 0.176–2.29 $\mu$ M | 20 nM       | water            | [8]       |
| fluorescence             | BSA functionalized AuNCs                                    | 0.01–10 $\mu$ M    | 10 nM       | N/A <sup>a</sup> | [9]       |
| fluorescence             | amine-capped SiQDs                                          | 5–500 nM           | 1 nM        | tap water        | This work |

<sup>a</sup>Not available.

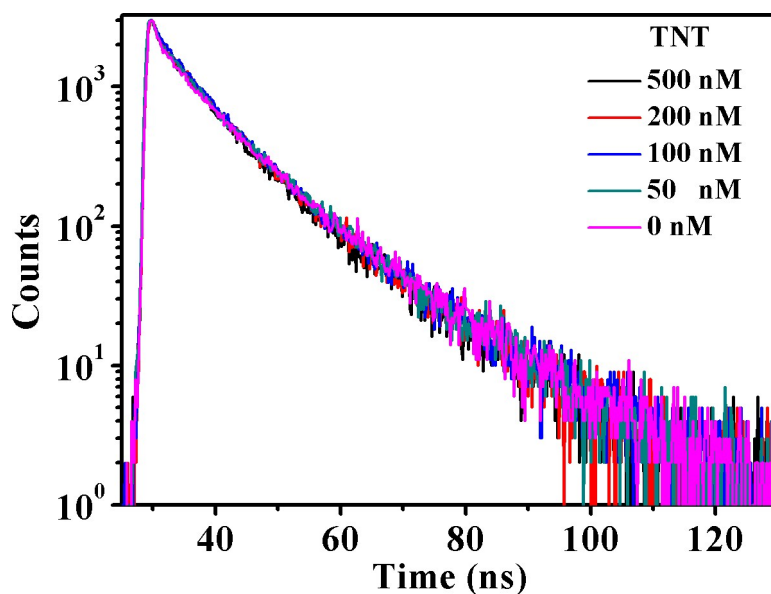

**Fig. S3** The PL lifetimes of SiQDs with varying concentrations of TNT in solution

## Reference

1. W. Qi, M. Xu, L. Pang, Z. Liu, W. Zhang, S. Majeed and G. Xu, *Chem.- Eur. J.*, 2014, **20**, 4829-4835.
2. S. S. R. Dasary, D. Senapati, A. K. Singh, Y. Anjaneyulu, H. Yu and P. C. Ray, *ACS Appl. Mater. Interfaces*, 2010, **2**, 3455-3460.
3. M. Goh and M. Pumera, *Anal. Bioanal. Chem.*, 2011, **399**, 127-131.
4. W.-S. Zou, J. Yang, T.-T. Yang, X. Hu and H.-Z. Lian, *J. Mater. Chem.*, 2012, **22**, 4720-4727.
5. R. Tu, B. Liu, Z. Wang, D. Gao, F. Wang, Q. Fang and Z. Zhang, *Anal. Chem.*, 2008, **80**, 3458-3465.
6. L. Fan, Y. Hu, X. Wang, L. Zhang, F. Li, D. Han, Z. Li, Q. Zhang, Z. Wang and L. Niu, *Talanta*, 2012, **101**, 192-197.
7. Y. Ma, S. Huang, M. Deng and L. Wang, *ACS Appl. Mater. Interfaces*, 2014, **6**, 7790-7796.
8. L. Feng, C. Tong, Y. He, B. Liu, C. Wang, J. Sha and C. Lü, *J. Lumin.*, 2014, **146**, 502-507.
9. X. Yang, J. Wang, D. Su, Q. Xia, f. chai, c. wang and F. Qu, *Dalton Trans.*, 2014, **43**, 10057-10063.
